# Supplementary material
Source: HighWire-hosted journal article supplement (https://n.neurology.org/content/suppl/2015/07/06/WNL.0000000000000892)
Supplement: naya_1453.pdf [file naya_1453.pdf]

# 근거기반 가이드라인 요약: 지대 및 말초근이영양증의 진단과 치료

미국신경과학회의 가이드라인 개발위원회와 미국 신경근육과 전기진단의학 임상 문제 검토 패널의 보고

## Evidence-based guideline summary: Diagnosis and treatment of limb-girdle and distal dystrophies

Report of the Guideline Development Subcommittee of the American Academy of Neurology and the Practice Issues Review Panel of the American Association of Neuromuscular & Electrodiagnostic Medicine

Pushpa Narayanaswami, MBBS, DM, FAAN  
 Michael Weiss, MD, FAAN  
 Duygu Selcen, MD  
 William David, MD, PhD  
 Elizabeth Raynor, MD  
 Gregory Carter, MD  
 Matthew Wicklund, MD, FAAN  
 Richard J. Barohn, MD, FAAN  
 Erik Ensrud, MD  
 Robert C. Griggs, MD, FAAN  
 Gary Gronseth, MD, FAAN  
 Anthony A. Amato, MD, FAAN

**목적:** 지대근이영양증(limb-girdle muscular dystrophies, LGMDs)의 진단과 치료에 대한 현재 근거들을 검토하여 임상 권고사항을 만들려고 하였다.

**방법:** 미국 신경과학회의 가이드라인 개발 과정을 이용하여 체계적인 리뷰와 임상 권고사항을 개발하였다.

**결과:** 대부분 LGMDs는 드물고, 추정 유병률의 범위는 10만명당 0.07에서 10만명당 0.43이었다. 몇몇 일부 근이영양증의 빈도는 연구 참여 인종에 따라 다양하였다. 몇몇 LGMDs 아형에서 구별되는 특징들이 있었는데, 근육을 침범하는 패턴, 심장 이상 유무, 근육 외 침범, 그리고 근육 조직검사 소견들이 그러하다. 몇몇 발표된 치료적 임상연구는 치료의 임상적인 효과를 확인할 수 있을 정도로 계획되지 못하였다.

**주요 권고사항:** 근이영양증으로 의심되는 환자에서, 임상적은 임상적 표현형, 유전 양상, 관련된 소견에 근거하여 유전적 진단에 이르는 임상적 접근 방식을 이용해야만 한다(Level B). LGMD 어떤 아형으로 새로이 진단받은 환자와 심장 합병증의 고위험군 환자는 심장 증상이 없더라도 임상적은 심장 평가를 위해 심장 전문가에게 의뢰 하여야 한다(Level B). LGMD로 진단 받은 고위험 호흡부전 환자에서 임상적은 주기적인 폐기능 검사를 시행하여야 한다(Level B). 임상적은 근이영양증으로 진단된 환자를 여러 전문 분야별로 신경근질환 환자를 체계적으로 관리할 수 있는 진료 시설로 의뢰해야 한다(Level B). 임상적은 LGMD로 진단된 환자에서 치료의 효과와 안전성을 결정하는 연구가 입증되지 않은 유전자 치료, 근원세포 이식, 마이오스타틴(myostatin) 또는 성장 호르몬 치료를 해서는 안 된다(Level R). 자세한 결과와 권고사항은 Neurology® Web site at Neurology.org에서 확인할 수 있다.

Neurology® 2014;83:1453-1463

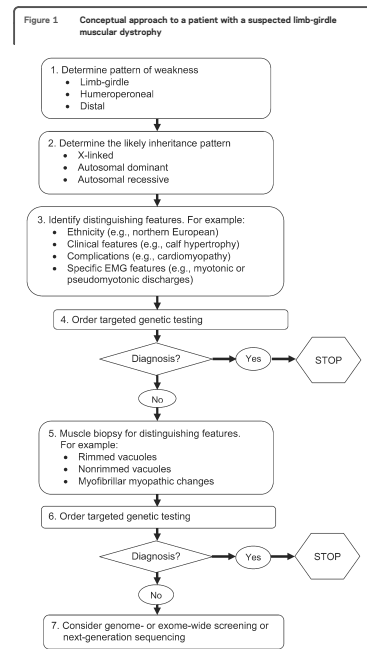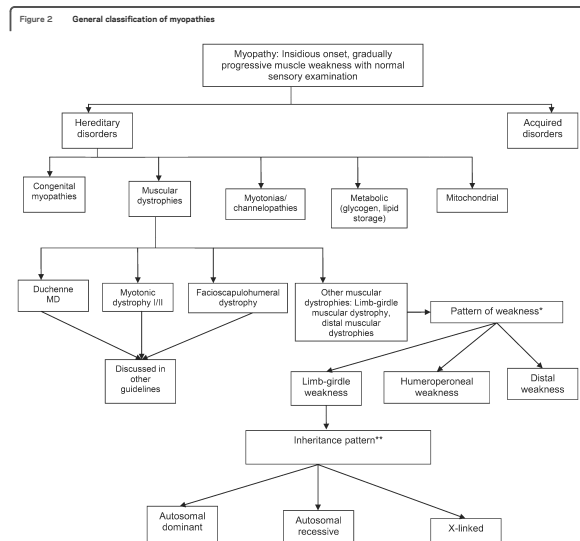

The differential diagnosis of myopathy includes several diverse conditions, both inherited and acquired. The neuromuscular examination, ancillary laboratory tests, and EMG assist in the differential diagnosis of these disorders. The term other muscular dystrophies is used here to indicate hereditary disorders of muscle that have 3 major phenotypes of weakness: limb-girdle, humeroperoneal, and distal. MD = muscular dystrophy. \*Other muscular dystrophy phenotypes: Limb-girdle pattern of weakness: symmetric weakness predominantly affecting the proximal legs and arms. Distal muscles may be involved but to a much lesser extent. Neck flexors and extensors may be involved. Humeroperoneal: humeral muscles (biceps and triceps) and the anterior compartment of the distal leg muscles. May be asymmetric. Distal: weakness involving the anterior or posterior compartments of the distal legs or the distal arm/forearm muscles. Other patterns: such as distal arm/proximal leg (inclusion body myositis), ptosis/ophthalmoplegia (myasthenia gravis, myotonic dystrophy, some congenital myopathies, oculopharyngeal muscular dystrophy, mitochondrial myopathy), and neck extensor weakness (dropped head syndrome) [amyotrophic lateral sclerosis, myasthenia gravis, inflammatory myopathies, isolated neck extensor myopathy], may be noted and suggest specific diagnoses other than limb-girdle muscular dystrophy and variants, as noted in parentheses. \*\*Autosomal dominant, autosomal recessive, or X-linked inheritance may be responsible in sporadic cases. Figures 3-5, e-1, and e-2 discuss the clinical approach to diagnosis using the inheritance pattern and the pattern of weakness (as outlined in figure 2) as a starting point.
